1 **Single cell visualisation of *mir-9a* and *Senseless* co-expression during *Drosophila***

2 ***melanogaster* embryonic and larval peripheral nervous system development**

3

4

5

6

7 *Lorenzo Gallicchio*<sup>1</sup>, *Sam Griffiths-Jones*<sup>1</sup>, *Matthew Ronshaugen*<sup>1,\*</sup>

8

9

10

11

12

13

14

15

16

17

18 <sup>1</sup>School of Biological Sciences, Faculty of Biology, Medicine and Health, The University of

19 Manchester, Manchester Academic Health Science Centre, Michael Smith Building, Oxford

20 Rd., Manchester. M13 9PT. UK

21

22

23

24

25 **Dynamics of *mir-9a* and *Sens* expression**

26

27

28 **Keywords**

29 MicroRNA, *mir-9a*, *Senseless*, Peripheral Nervous System, embryogenesis, Wing Disc

30

31

32

33

34

35 \*Corresponding author

36 e-mail: [matthew.ronshaugen@manchester.ac.uk](mailto:matthew.ronshaugen@manchester.ac.uk)

37 phone: +44 7577289880

38

39

40

41

42

43

44

45

46

47

48

49 **Abstract**

50 The *Drosophila melanogaster* peripheral nervous system (PNS) comprises the sensory  
51 organs that allow the fly to detect environmental factors such as temperature and pressure.  
52 PNS development is a highly specified process where each sensilla originates from a single  
53 sensory organ precursor (SOP) cell. One of the major genetic orchestrators of PNS  
54 development is *Senseless*, which encodes a zinc finger transcription factor (Sens). Sens is  
55 both necessary and sufficient for SOP differentiation. *Senseless* expression and SOP number  
56 are regulated by the microRNA *miR-9a*. However, the reciprocal dynamics of *Senseless* and  
57 *miR-9a* are still obscure. By coupling smFISH with immunofluorescence, we are able to  
58 visualize transcription of the *mir-9a* locus and expression of Sens simultaneously. During  
59 embryogenesis, we show that the expression of *mir-9a* in SOP cells is rapidly lost as  
60 *Senseless* expression increases. However, this mutually exclusive expression pattern is not  
61 observed in the third instar imaginal wing disc, where some *Senseless*-expressing cells show  
62 active sites of *mir-9a* transcription. These data challenge and extend previous models of  
63 *Senseless* regulation, and show complex co-expression dynamics between *mir-9a* and  
64 *Senseless*. The differences in this dynamic relationship between embryonic and larval PNS  
65 development suggest a possible switch in *miR-9a* function. Our work brings single-cell  
66 resolution to the understanding of dynamic regulation of PNS development by *Senseless* and  
67 *miR-9a*.

68

69

70

71

72

73 **Introduction**

74

75 One of the most impressive demonstrations of developmental robustness is the  
76 specification of the *Drosophila melanogaster* peripheral nervous system (PNS), which  
77 comprises all the organs that allow the fly to detect movement, pressure, temperature, and  
78 more. *Drosophila* sensilla number and position exhibit little or no variation from individual  
79 to individual, even in diverse environmental conditions (Hartenstein 1988). The key early  
80 developmental step involves the selection and specification of sensory organ precursor  
81 (SOP) cells from a field of equipotent cells. During early embryogenesis (~5h from  
82 fertilization), groups of epidermal cells start to express Achete-Scute complex genes. These  
83 proneural genes impart the potential to become neurons (Jarman *et al.* 1993; Jan and Jan  
84 1994; Goulding *et al.* 2000; Huang *et al.* 2000; Reeves and Posakony 2005). This potential is  
85 then constrained via Notch lateral inhibition to a single cell in the cluster, the SOP cell  
86 (Ghysen and Dambly-Chaudiere 1989; Artavanis-Tsakonas and Simpson 1991). The many  
87 different classes of sensory organs all originate from SOPs and develop via common shared  
88 rounds of cellular division (Lai and Orgogozo 2004). The eventual differences between  
89 sensory organs arise in part through subsequent changes in cell death and proliferation  
90 (Orgogozo *et al.* 2001; Orgogozo and Schweisguth 2004).

91

92 One of the major effectors of PNS development is a gene named *Senseless (Sens)* (Nolo *et al.*  
93 2000). *Sens* encodes a transcription factor (Sens) whose expression is initially activated and  
94 subsequently maintained by the proneural genes *achete* and *scute* (Jafar-Nejad *et al.* 2006).  
95 *Sens* in turn maintains the expression of proneural genes to direct proper neuronal cell  
96 differentiation (Nolo *et al.* 2000; Acar *et al.* 2006). *Sens* expression is first detectable during

97 stage 10 of *Drosophila* embryogenesis, as isolated cells start to specify according to their  
98 SOP fate potential. As embryogenesis proceeds, these isolated *Sens*-expressing SOPs  
99 ultimately give rise to the entire sensory organ. *Sens* expression becomes repressed around  
100 stage 13, when SOPs are fully specified (Nolo *et al.* 2000). Since *Sens* maintains proneural  
101 gene activation, loss-of-function *Sens* mutant embryos exhibit a decreased number of SOPs,  
102 corresponding to a loss of sensory organs in the adult fly (Nolo *et al.* 2000). Gain of function  
103 mutations and ectopic expression of *Sens* cause an increased number of SOPs and  
104 consequently sensory organs (Jafar-Nejad *et al.* 2003; Li *et al.* 2006). Therefore, it is  
105 suggested that *Sens* is necessary and sufficient for SOP differentiation (Nolo *et al.* 2000). The  
106 robustness and reproducibility of sensory organ development between individuals  
107 implicates *Sens* as a keystone gene whose fine-scale regulation involves multiple feedback  
108 inputs.

109

110 Neurogenesis is extensively regulated by microRNAs (miRNAs) (Nolo *et al.* 2000; Hilgers *et*  
111 *al.* 2010; Caygill and Brand 2017). These small regulators of translation and mRNA stability  
112 contribute to the robustness of many biological processes. It has been shown that *miR-*  
113 *263a/b* stabilize sensory organ patterning in the retina by inhibiting SO cell apoptosis  
114 (Hilgers *et al.* 2010), and that *miR-7* stabilizes neuronal differentiation in the *Drosophila*  
115 larval brain by targeting the Notch pathway (Caygill and Brand 2017). In addition, Li and co-  
116 workers (2006) showed that *miR-9a* regulates *Sens* function through multiple target  
117 recognition sites in the *Sens* 3' UTR. When *Sens*' *miR-9a* binding sites are mutated, *Sens*  
118 levels are not only higher but more sensitive to temperature perturbations (Cassidy *et al.*  
119 2013), resulting in an altered distribution of sensory organs in the wing margin (Cassidy *et*  
120 *al.* 2013; Giri *et al.* 2020). Loss-of-function and over-expression of *miR-9a* produce opposite

121 phenotypes with respect to *Senseless* in both embryos and larvae. Thus the phenotypic  
122 consequences of *miR-9a* disruption mirror those of *Sens*, suggesting that *miR-9a* is  
123 necessary to ensure appropriate *Sens* expression in the right cells and at the right level to  
124 convey robustness to SOP specification (Li *et al.* 2006).

125

126 The *miR-9a* microRNA is a member of one of the ~30-40 families that are predicted to pre-  
127 date the divergence of protostomes and deuterostomes, and therefore to be conserved in  
128 essentially all bilaterian animals (Wheeler *et al.* 2009; Ninova *et al.* 2014). In every animal  
129 where *miR-9* family members have been studied functionally, they are found to regulate  
130 processes related to neurogenesis and neuronal progenitor proliferation (Sempere *et al.*  
131 2004; Wheeler *et al.* 2009; Delaloy *et al.* 2010). For instance, over-expression of *miR-9* in  
132 zebrafish embryo (Leucht *et al.* 2008), mouse embryonic cortex (Zhao *et al.* 2009) and  
133 chicken spinal cord (Yoo *et al.* 2011) all lead to a reduction of the number of proliferating  
134 neural progenitors and impairment of PNS development. These studies demonstrate clear  
135 similarities between *miR-9* expression and function in *Drosophila* and vertebrates. Disrupted  
136 *miR-9* function has also been linked with some human pathologies, including cancer  
137 progression (Nowek *et al.* 2018) and neurodegenerative amyloid diseases (Packer *et al.*  
138 2008). For instance tumorigenic cells from medulloblastoma appear to have decreased  
139 expression of *miR-9*, while a subclass of glioblastoma tumour cells express *miR-9* at a higher  
140 level (Ferretti *et al.* 2009; Kim *et al.* 2011). In addition, *miR-9* has been also found to have a  
141 role as a proto-oncogene and/or as a tumour-suppressor gene during progression of cancers  
142 not directly related with the nervous system (Coolen *et al.* 2013).

143

144 The current model of *miR-9a* function in *Drosophila* SOP specification suggests mutually  
145 exclusive reciprocal expression of *miR-9a* and *Sens* in SOPs (Li *et al.* 2006). This in turn  
146 suggests a role for *miR-9a* in ensuring that only one of the cells in the progenitor field takes  
147 on SOP identity. In this work, we use single-cell quantitative FISH and nascent transcript  
148 FISH to investigate the *miR-9a/Sens/SOP* regulatory model in hitherto unseen detail. This  
149 use of single-molecule *in situ* hybridization (smFISH) coupled with immunofluorescence (IF)  
150 allows us to simultaneously visualize active sites of *miR-9a* transcription and *Sens* protein in  
151 both embryos and larval wing disc at the single cell level. We use these data to analyse the  
152 dynamics of *miR-9a* transcription and *Sens* protein abundance. We find that *miR-9a* and  
153 *Sens* are initially co-expressed, but ultimately exhibit a dynamic reciprocal expression  
154 pattern. We observe that *miR-9a* transcription becomes rapidly repressed in high *Sens*  
155 expressing SOPs during embryogenesis, presumably as *Sens* protein accumulates in the cell  
156 nucleus. A subtly different co-expression dynamic was observed during wing disc  
157 development, where many SOPs also express *miR-9a*. These SOPs exhibit an inverse  
158 relationship between *Sens* abundance and *miR-9a* transcription. These new data refine and  
159 expand the previous model to provide key new insights into *miR-9a/Sens* regulation in PNS  
160 development (Li *et al.* 2006). In particular, we include for the first time a temporal element  
161 to the understanding of the dynamics of *miR-9a* regulation of SOP differentiation.

162

163

164

165

166

167

168

169

## 170 **Methods**

171

### 172 Fly stocks, embryo collection and fixing and larval dissection

173 Flies were grown at 25°C or 18°C. Embryos were collected after ~20h and fixed in 1V  
174 heptane + 1V 4% formaldehyde for 30 minutes shaking at 220 rpm. The embryos were then  
175 washed and shaken vigorously for one minute in 100% methanol. Fixed embryos were  
176 stored in methanol at -20°C. Larvae were dissected in 1XPBS, carcasses were fixed in 1V  
177 1XPBS + 1V 10% formaldehyde for ~1h, washed with methanol and stored in methanol at -  
178 20°C.

179

180 Genotypes used for this study are: W [1118], Bloomington stock 3605 and 2XTY1-SGFP-V5-  
181 preTEV-BLRP-3XFLAG-Sens, VDRC stock ID 318017

182

### 183 Probe design, smFISH and immunofluorescence

184 We adapted the inexpensive version (Tsanov *et al.* 2016) of the conventional smFISH  
185 protocol in *Drosophila* (Trcek *et al.* 2017). Primary probes were designed against the mature  
186 *Senseless* and sfGFP mRNA and a genomic region flanking the *mir-9a* gene locus, all from  
187 FlyBase, using the Biosearch Technologies Stellaris probe Designer (version 4.2). To the 5'  
188 end of each probe was added the Flap sequence CCTCCTAAGTTTCGAGCTGGACTCAGTG.  
189 Multiple secondary probes that are complementary to the Flap sequence were tagged with  
190 fluorophores (CAL Fluor Orange 560, CAL Fluor Red 610, Quasar 670) to allow multiplexing.



191 Antibodies used were Anti Green Fluorescent Protein rabbit igG fraction (Invitrogen  
192 #A11122) at 1:500, anti-Sens (Nolo *et al.* 2000) at 1:1000, Goat anti-Guinea Pig IgG (H+L)  
193 Highly Cross-Adsorbed Secondary Antibody Alexa Fluor 555 (Invitrogen #A21435) at 1:500,  
194 and Goat anti-Rabbit IgG (H+L) Cross-Adsorbed Secondary Antibody Alexa Fluor 488  
195 (Invitrogen #A11008) at 1:500.

196

### 197 Imaging and quantification

198 Imaging was performed using a Leica SP8 Inverted Tandem Head confocal microscope with  
199 LAS X v.3.5.1.18803 software (University of Manchester Bioimaging facility), using 20X, 40X  
200 and 100X magnifications. Deconvolution was performed using Huygens Pro v16.05 software.  
201 Protein fluorescence levels were measured using FIJI for Macintosh. From each picture, five  
202 measurements of background mean intensity were taken. Each single cell measurement was  
203 then adjusted using the formula: integrated density of nucleus – (area of nucleus x  
204 background mean).

205

206

207

208

209

210

211

212

213

214

215

216

## 217 **Results**

218

### 219 ***miR-9a* is expressed in the dorsal ectoderm during embryogenesis and ubiquitously in the** 220 **wing disc**

221

222 In order to understand the interaction between *miR-9a* and its target *Senseless*, we first  
223 systematically describe the *mir-9a* expression pattern in the embryo and imaginal disc at the  
224 single cell level. Imaging mature miRNAs is difficult. Previously applied techniques require  
225 amplification and often have significant background noise problems (e.g. probes labelled  
226 with digoxigenin) (Biryukova *et al.* 2009). Many researchers have tried to overcome this (Lu  
227 and Tsourkas 2009), but these approaches still have very limited use for single cell analysis  
228 and quantification.

229

230 We have used a nascent transcript approach using single molecule FISH to detect expression  
231 in cells that are actively producing the miRNA primary transcript (pri-miRNA). To do so we  
232 have designed sets of ~48 probes (table 3) that hybridize to a ~1kb region in the primary  
233 miRNA transcript flanking the *mir-9a* locus. This allows the detection of active *mir-9a*  
234 transcription in the cell nuclei as previously described by Aboobaker and co-workers (2005).  
235 We find that expression of *mir-9a* initiates in early stage 5, at which point it is expressed  
236 throughout the dorsal ectoderm of the embryo (Fig. 1 A-A'). The pattern displays a precise

237 boundary between actively transcribing cells and non-expressing cells, which correlates with  
238 the mesoderm-ectoderm boundary similar to that described by Fu et al. (2014). There are  
239 also small domains at the posterior and anterior embryonic ends lacking *mir-9a* expression.  
240 Later, during *Drosophila* embryonic stages 6 and 7, *mir-9a* expression is maintained in this  
241 pattern throughout the ectoderm (Fig. 1 B-B' and Fig.1 C-C'), clearly marking the boundary  
242 between ectodermal cells and invaginating mesodermal cells. At stage 8, the mesoderm is  
243 almost completely invaginated and the *mir-9a* expression domain covers the embryo  
244 surface (Fig. D-D'), with the exclusion of the same regions at the anterior and posterior  
245 ends. At stages 11 and 14, *mir-9a* continues to be expressed throughout the ectoderm,  
246 except from a dorsal anterior region, and it is largely absent from the amnioserosa (Fig. 1 E-  
247 F).

248

249 It has previously been reported that *mir-9a* is expressed widely in the 3<sup>rd</sup> instar wing disc but  
250 not in cells expressing *Senseless* (Li et al. 2006; Biryukova et al. 2009). Similarly, we observed  
251 that *mir-9a* is actively transcribed everywhere in the wing disc, with the exception of a few  
252 randomly distributed cells (Fig. 1 G).

253

#### 254 **Immunodetection of *Sens*-sfGFP fusion protein allows the study of *Sens* expression in** 255 ***Drosophila* embryos at single-cell resolution**

256

257 The role of *miR-9a* in regulating the transcription factor *Senseless* (*Sens*) is well  
258 characterised genetically during SOP specification (Li et al. 2006; Cassidy et al. 2013). To  
259 investigate the dynamics of *miR-9a* regulation of *Sens* we developed a strategy to  
260 simultaneously observe *Sens* transcription and protein accumulation at the single-cell level

261 via confocal fluorescent microscopy. In principle, the efficient detection of proteins in fixed  
262 samples using IF relies on the availability of antibodies that can specifically detect the  
263 protein of interest. Alternatively, there have been developed reporter *Drosophila* lines that  
264 express the protein of interest fused to a reporter protein that can be detected  
265 enzymatically or by fluorescence (Timmons *et al.* 1997; Chatterjee and Bohmann 2012). We  
266 have therefore used a transgenic *Drosophila* reporter line that carries two additional C-  
267 terminally tagged Sens-sfGFP reporters that can be detected either directly (live imaging) or  
268 by immunofluorescence (Sarov *et al.* 2016). We were therefore able to use two methods in  
269 order to examine Sens dynamics: direct detection of Sens using antibodies against the  
270 endogenous protein, and indirectly using anti-GFP antibodies. To validate that the reporter  
271 accurately reflects endogenous Sens protein pattern and level we performed a double  
272 staining experiment against endogenous Sens using an anti-Sens antibody (obtained from H.  
273 Bellen lab; Nolo *et al.*, 2000), and an anti-sfGFP antibody, in both embryos and wing discs  
274 (Fig.2). Under these conditions, we expect that anti-Sens antibodies tag protein products  
275 deriving from 4 *Senseless* genes (2 wild type and 2 sfGFP-tagged), while anti-sfGFP  
276 antibodies detect products from only the 2 sfGFP-tagged genes.

277

278 The co-localization of the WT and sfGFP-tagged signals in embryogenesis and wing disc  
279 development are shown in Fig. 2. The data clearly show that during both embryogenesis  
280 (Fig. 2 A-D) and wing disc development (Fig 2 E-H), the two signals co-localize in the same  
281 cells. We are therefore confident that the reporter accurately recapitulates the endogenous  
282 pattern of Sens expression during embryonic and wing imaginal disc development. We  
283 further measured the relative fluorescence from each of the two antibodies in single cells to  
284 ensure that the reporter gene reflects Sens abundance. As expected, the sfGFP reporter is

285 expressed proportionally to *Senseless* in both embryos (Fig. 2 D) and wing discs (Fig. 2 I).

286 This indicates that the fluorescence signal from antibodies against sfGFP provides reliable  
287 information on endogenous *Senseless* localization and relative expression levels.

288

289 ***mir-9a* expression pattern and *Senseless* protein levels are inversely correlated during**  
290 **embryogenesis**

291

292 In order to study the reciprocal dynamics of *mir-9a* and *Senseless* during embryogenesis and  
293 wing disc development, we simultaneously tracked active sites of *mir-9a* transcription  
294 (transcription sites – TS) using smFISH and Sens abundance via IF. We investigated these  
295 patterns at three different stages of embryonic development: stage 10, 11 and 12 (Fig. 3 A-  
296 C) after early *Senseless* expression and the initial stages of SOP specification. Interestingly  
297 we found that *mir-9a* transcription levels were inversely correlated with *Senseless* protein  
298 levels, and that *mir-9a* transcription is repressed rapidly after the initiation of Sens  
299 expression. Intriguingly, we noticed that a very small number of *Senseless*-expressing cells  
300 also displayed active *mir-9a* TSs (Fig. 3 A''-C''). Moreover, when we look at the fluorescence  
301 levels of sfGFP and the size of *mir-9a* TSs in the subset of cells that express both, it is evident  
302 that both miRNA active transcription and Sens level are lower in comparison to the rest of  
303 the cells. We believe that *Senseless* has just started to be translated in these cells and *mir-*  
304 *9a* transcription is stopping. Our interpretation is that the accumulation of Sens in the  
305 nucleus is associated with repression of *mir-9a* transcription, either by direct repression, or  
306 through an intermediary negative regulator.

307

308 To further investigate the dynamic relationship between expression of *mir-9a* and Sens, we  
309 developed a multi-channel experiment to simultaneously study the expression pattern of  
310 *mir-9a* TSs and Sens-sfGFP with *Senseless* and sfGFP mRNAs (Fig. 4). Intriguingly, we observe  
311 that cells that are transcribing *Senseless*, but that have not yet accumulated observable  
312 quantities of Sens protein (total lack of sfGFP signal), transcribe *mir-9a* (Fig. 4 B). *Senseless*  
313 expressing cells occupy several embryonic cellular layers. From an orthogonal projection  
314 that allows clear visualization of embryonic cell layers, we can see that cells containing Sens  
315 protein are located inwards, whereas cells that are transcribing both *mir-9a* and *Senseless*  
316 mRNA, but not yet translating Sens protein, are usually localized on the embryonic surface  
317 (Fig.4 C). We believe that the rapid dynamic changes in *mir-9a* expression are correlated  
318 with SOP differentiation, during which SOPs progressively migrate inwards as Sens protein  
319 accumulates and *mir-9a* is turned off.

320

321 ***mir-9a* is actively transcribed in cells containing Sens during early SO specification in the**  
322 **third instar imaginal wing disc**

323

324 Since *Senseless* regulates SOP differentiation during PNS development in the *Drosophila*  
325 larvae (Singhania and Grueber 2014), we applied the approach outlined above to study *mir-*  
326 *9a* expression pattern and Sens abundance in third instar imaginal wing discs at the single  
327 cell level. The adult *Drosophila* wing possesses a spatially organized series of bristles (a class  
328 of SO) located at the wing margin (Lu *et al.* 2011). Flies in which Sens is ectopically  
329 expressed in the wing disc exhibit an increased bristle number in that wing region (Jafar-  
330 Nejad *et al.* 2003). During larval development, *Senseless* starts to be expressed at around  
331 15h after third instar ecdysis in single SOPs in the wing notum. At around 30h *Senseless* is

332 expressed in an increased number of isolated SOPs in the wing and notum area plus in 2  
333 distinct stripes of cells in the wing disc pouch (Mirth *et al.* 2009). Cells belonging to these 2  
334 rows of *Senseless*-expressing cells will give rise to the adult wing margin bristles (Jafar-Nejad  
335 *et al.* 2006).

336

337 By nascent transcript smFISH, we observed that *mir-9a* is expressed in nearly all cells in the  
338 wing disc. When we correlated *mir-9a* expression with that of *Senseless* in third instar discs  
339 we identified a small population of *Senseless* expressing cells with no *mir-9a* expression.

340 These cells always had high levels of Sens protein, similar to our observations in the embryo.

341 We also observed that many cells that have low or intermediate Sens protein levels are

342 actively transcribing *mir-9a* (Fig. 5 A-B). It is interesting to note that *mir-9a* TSs size in

343 *Senseless*-expressing cells do not differ from the size of TSs belonging to cells that are not

344 expressing Sens protein. This indicates that these cells may not shut down *mir-9a*

345 transcription, which might be kept active or modulated via transcriptional bursting.

346 Nonetheless, at this stage only a minority of cells that contain Sens protein are not

347 transcribing *mir-9a*. We therefore measured the intensity coming from sfGFP antibody (a

348 proxy for Sens protein levels) at the single cell level to see if there was a difference in

349 *Senseless* levels between *mir-9a*-expressing and non-expressing cells. The data clearly show

350 that Sens is more abundant in cells that are not transcribing *mir-9a* (Fig. 5 C). However, our

351 finding of concurrent expression of Sens and *mir-9a* contradicts aspects of the previously

352 established model of triple row bristle specification (Li *et al.* 2006), which suggested a binary

353 co-expression pattern.

354

355

356 **Discussion**

357

358 The stable and reproducible development of the *Drosophila* PNS is an extraordinary model  
359 of how the stereotyped stability of cellular differentiation is achieved (Jan and Jan 1994;  
360 Barad *et al.* 2011). In this study we focused on the role of *Drosophila mir-9a* in regulating  
361 the function of *Sens*, a crucial transcription factor that orchestrates SOP differentiation and  
362 PNS development in embryos and larvae. Dysregulated *mir-9a* expression results in  
363 disrupted *Sens* function leading to altered SOP differentiation and loss of stable stereotyped  
364 neural development (Li *et al.* 2006; Cassidy *et al.* 2013). It has been hypothesized that Notch  
365 signalling plays a key role in regulating *mir-9a* transcription in epithelial cells adjacent to  
366 potential SOPs thus preventing accumulation of *Sens* and unintended differentiation of  
367 additional SOPs (Li *et al.* 2006). Despite extensive study of *Sens* expression (Nolo *et al.* 2000;  
368 Mirth *et al.* 2009), there is little information regarding the developmental profile of *Sens*  
369 and *mir-9a* co-expression.

370

371 During embryonic development, we show that *mir-9a* is initially expressed throughout the  
372 neurogenic ectoderm, and a mutually exclusive expression pattern with *Sens* is established.  
373 Our single cell analysis shows that cells just initiating *Sens* expression, who therefore have  
374 not accumulated measurable *Sens* protein, actively transcribe *mir-9a*. However once *Sens*  
375 protein levels increase, *mir-9a* transcription is lost. The data suggest that *mir-9a* expression  
376 is turned off when the level of *Sens* protein reaches a specific threshold. Without *miR-9a*  
377 repression, *Sens* protein then accumulates rapidly, leading to SOP differentiation (Fig. 6 A-  
378 B). We suggest that this negative feedback loop involving *Sens* and *miR-9a* may be key in the



379 regulative establishment of the SOP pattern. It is currently unclear if *Senseless* directly  
380 switches off *mir-9a* transcription or if it is an indirect effect of a multi-level genetic cascade.  
381  
382 Li and co-workers presented evidence that in the third instar wing imaginal disc cells that  
383 express *Senseless* do not express *mir-9a*, which is otherwise widely expressed throughout  
384 the disc (Li *et al.* 2006). We find that *mir-9a* and *Senseless* are often though not always co-  
385 expressed in the wing disc. More specifically we find that among the *Senseless* expressing  
386 cells, those that are also transcribing *mir-9a* present a lower level of nuclear *Sens*, similar to  
387 that seen fleetingly prior to the establishment of the terminal and mutually exclusive  
388 pattern of SOP specification in the early embryo. The main difference here is that this subset  
389 of cells in the wing disc do not seem to be stopping *mir-9a* expression as it was happening in  
390 the embryo. This suggests that *mir-9a* and *Senseless* have an intricate reciprocal dynamic  
391 expression during embryogenesis and larval development.  
392  
393 Our findings complement the model (Fig. 6 D-E) presented by Li (Li *et al.* 2006) and show  
394 that *mir-9a* and *Senseless* exhibit dynamic co-expression rather than a binary one. Our  
395 findings are also in concordance with the suggestion by Jafar-Nejad (2006) that the genes  
396 that orchestrate PNS development in embryos and larvae might be different, even though  
397 the process follows a similar pattern. For instance, during embryogenesis *achete* and *scute*  
398 are necessary for *Sens* activation, while during larval development this function is  
399 accomplished by *Wingless* (Jafar-Nejad *et al.* 2006). *mir-9a* function might therefore differ  
400 between embryonic and larval SOP development via the presence or absence of other *mir-*  
401 *9a* targets. We propose that *mir-9a* repression during embryogenesis allows *Sens* to reach a  
402 specific threshold in order to establish the correct number and pattern of embryonic SOPs.

403 During larval development, *Sens* might be expressed at different levels depending on the  
404 subclass of SO and this in part involves regulatory feedback by *mir-9a*. The fly wing margin  
405 possesses 2 different kinds of SO, the mechanoreceptors and chemoreceptors, and these  
406 have a very precise pattern (Hartenstein 1993; Raad *et al.* 2016). *mir-9a* expression may be  
407 involved in a regulatory loop with *Sens* to set different *Sens* levels and thereby control the  
408 kind of SO that will develop from each particular SOP. Our data further suggest that *Sens*-  
409 expressing cells that are not transcribing *mir-9a* will adopt chemoreceptor SOP fate:  
410 chemoreceptors are lower in number than mechanoreceptors and their localization and  
411 alternation resembles the pattern of cells with high *Sens* expression level. Therefore, we  
412 believe that *mir-9a* serves to keep *Sens* expression low in mechanoreceptor precursor cells  
413 to ensure they adopt the correct SOP cell fate. Temporally, our model suggests that *mir-9a*  
414 is initially expressed in all *Sens*-expressing cells, delaying the adoption of a specific SOP fate  
415 (Fig. 6 F-G). As SOPs adopt their specific cell fate, *mir-9a* is switched off as a consequence of  
416 the transition from a multipotent precursor to a determined cell.

417

418 Our work suggests that *mir-9a* has a dynamic role in the specification of SOP differentiation,  
419 tuning *Sens* expression to ensure that the correct number of cells adopt the appropriate  
420 SOP fate. The molecular mechanism that dictates *mir-9a* transcription during PNS  
421 development remains unknown; its elucidation is important for complete understanding of  
422 this dynamic process. A fundamental question that needs to be answered is the mechanism  
423 by which the mutual regulation of *mir-9a* and *Sens* act to establish the observed co-  
424 expression dynamic, switching from mutually exclusive to co-expressed depending on the fly  
425 developmental stage. This study demonstrates the importance of examining miRNA  
426 regulation and miRNA-target gene expression dynamics at a single cell level in the

427 developing organism. We suggest that these dynamic co-regulatory processes are a general  
428 feature of microRNA function during development.

429

#### 430 **Acknowledgments**

431 We thank the staff from the University of Manchester' Bioimaging Facility, in particular Dr.  
432 Peter March, for help with confocal microscopy. We also thank Hugo J. Bellen from the  
433 Howard Hughes Medical Institute for providing the anti-Sens antibody and Dr. Fabian  
434 Morales-Polanco for discussions and comments on the manuscript. This work was funded by  
435 a Wellcome Trust funded 4-years PhD studentship [203808/Z/16/Z] to LG.

436

#### 437 **Author contributions**

438 LG, MR and SGJ conceived the project. Experiments were designed by LG and MR and  
439 performed by LG. The manuscript was written by all the authors.

440

#### 441 **Competing interests**

442 The authors declare no competing interests.

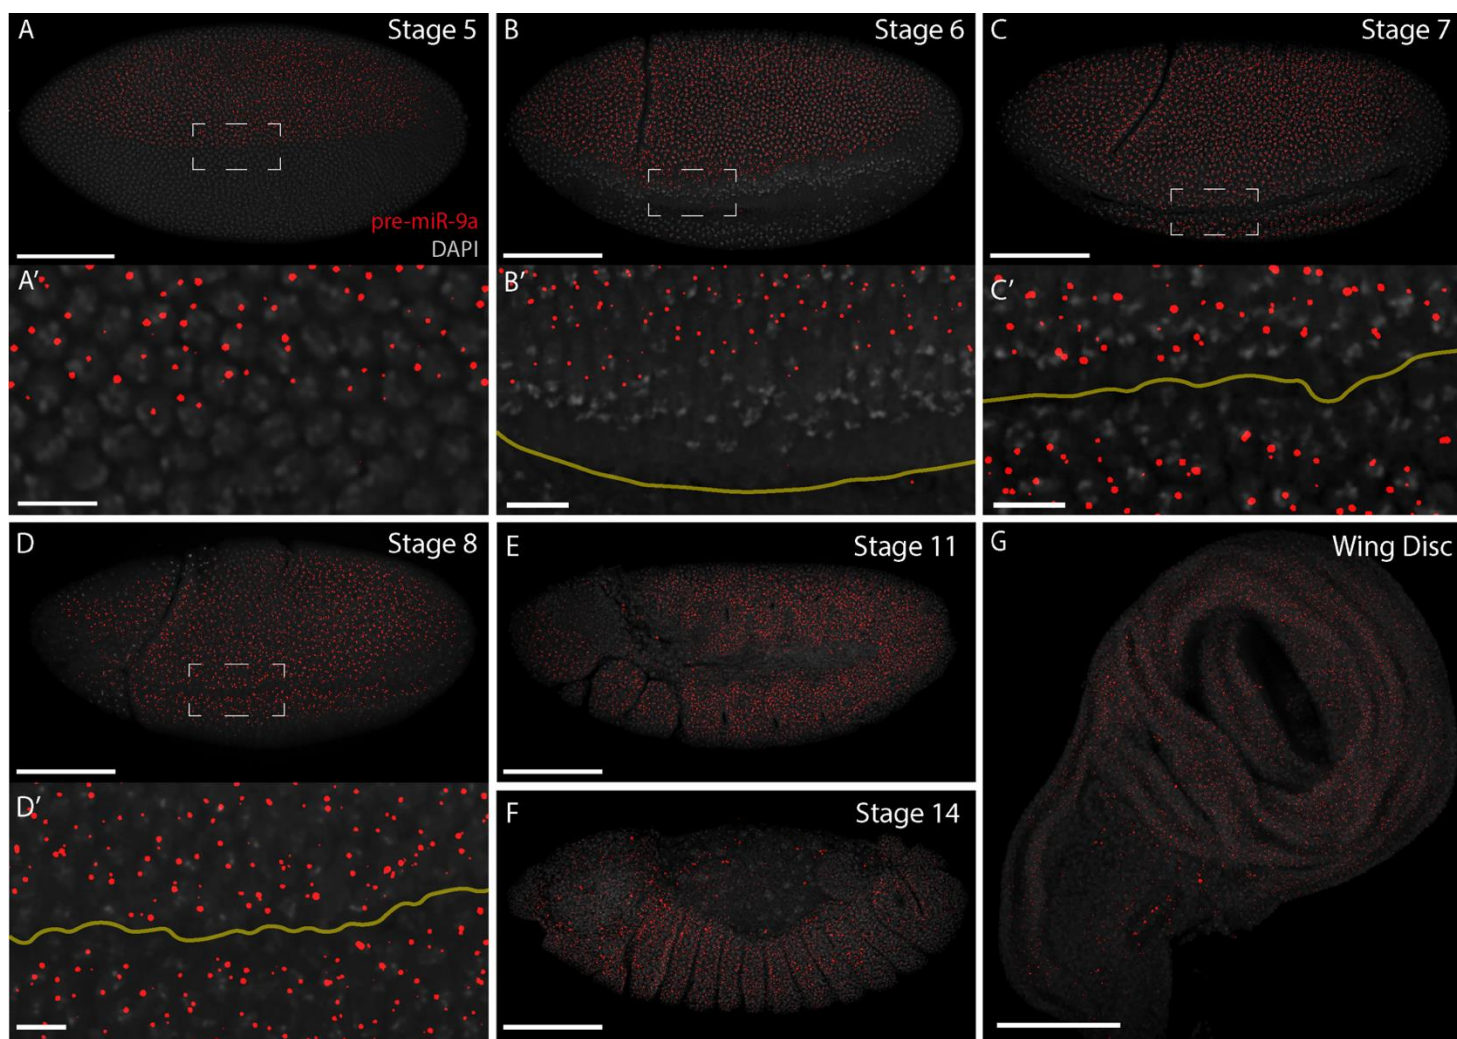

444

445 **Figure 1. *mir-9a* expression pattern during embryogenesis and in the wing disc.** Cells that  
446 are actively transcribing *mir-9a* present one or two puncta, indicating *mir-9a* active TSSs. (A-  
447 A') Stage 5 WT *Drosophila* embryo: *mir-9a* is expressed in the dorsal ectoderm, before the  
448 ventral furrow is evident. (B-B') Stage 6 WT: The *mir-9a* expression domain extends towards  
449 the forming ventral furrow (highlighted with a yellow line). (C-C') Stage 7 WT. (D-D') Stage 8  
450 WT. (E-F) At later stages, *mir-9a* is expressed throughout the ectoderm. (G) WT *Drosophila*  
451 wing disc: *mir-9a* is expressed widely throughout the disc. Scalebars: (A) 100  $\mu\text{m}$ , (A') 10  $\mu\text{m}$ ,  
452 (G) 100  $\mu\text{m}$ .

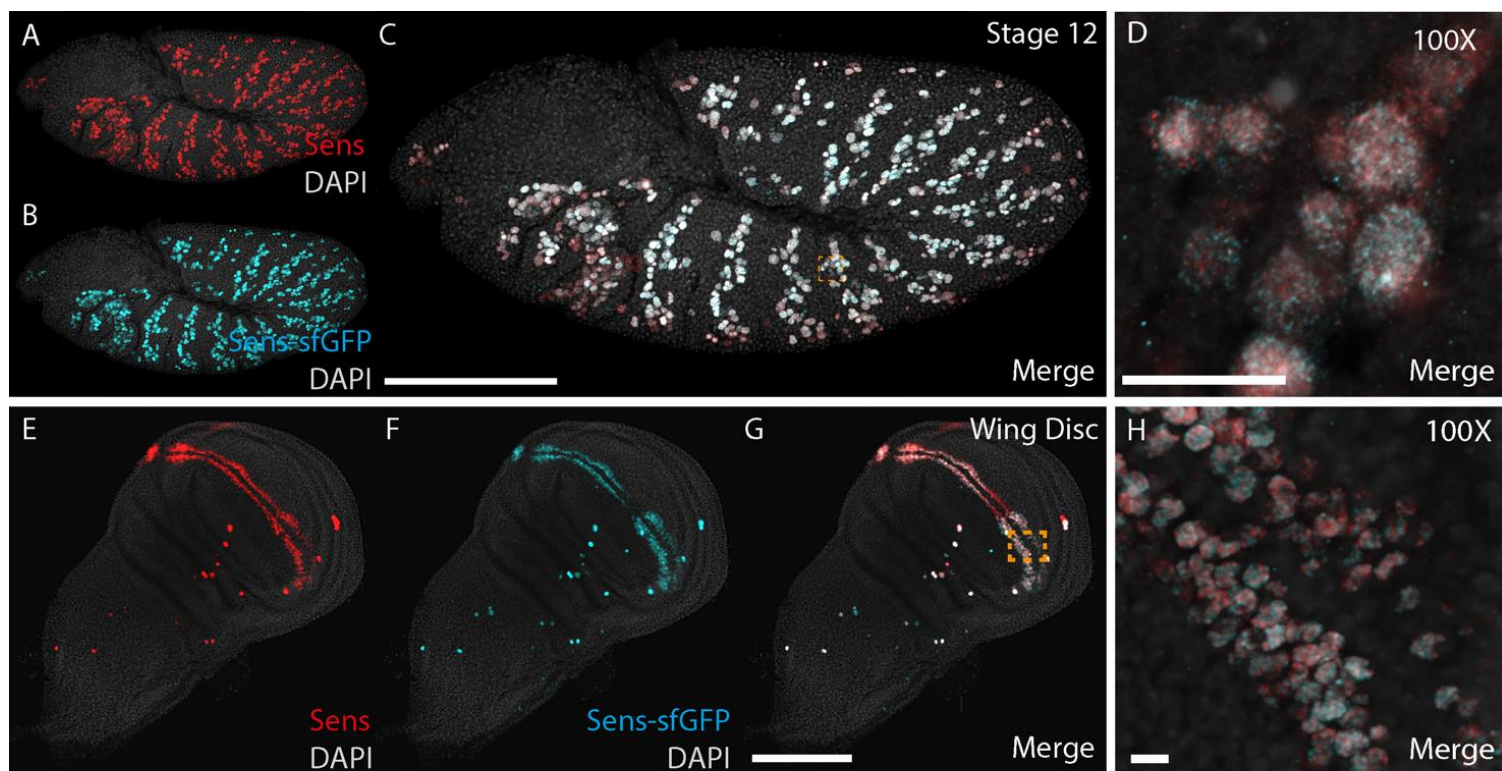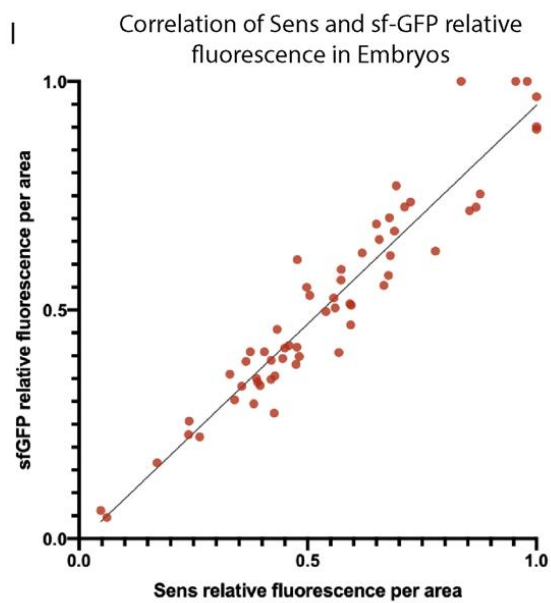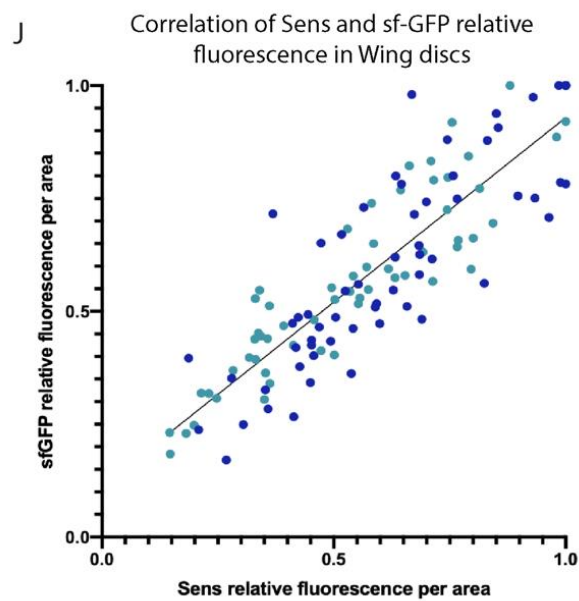

454

455 **Figure 2. Colocalization of sfGFP reporter with endogenous Sens.** Transgenic stage 12  
456 embryo stained with antibodies against Sens (A, red) and sfGFP (B, cyan). The two  
457 antibodies colocalize (merged in D,E), showing that the sfGFP reporter is expressed in the  
458 same cells that are expressing endogenous Sens. Transgenic third instar larval wing disc  
459 stained with antibodies against Sens (E, red) and sfGFP (F, cyan). Again, the two antibodies  
460 colocalize in the same cells (merged in G,H). Correlation between relative fluorescence of  
461 Sens antibody and sfGFP antibody in embryos (I) and wing disc (J). For each of 3 embryos,  
462 fluorescence measurements were performed in 10 cells, while for each of 3 wing disc, 20  
463 cells were measured. For each replicate, antibody fluorescence was normalized using the  
464 maximum value measured in that replicate. Scalebars: (C) 100  $\mu\text{m}$ , (D) 10  $\mu\text{m}$ , (G) 100  $\mu\text{m}$ ,  
465 (H) 10  $\mu\text{m}$ .

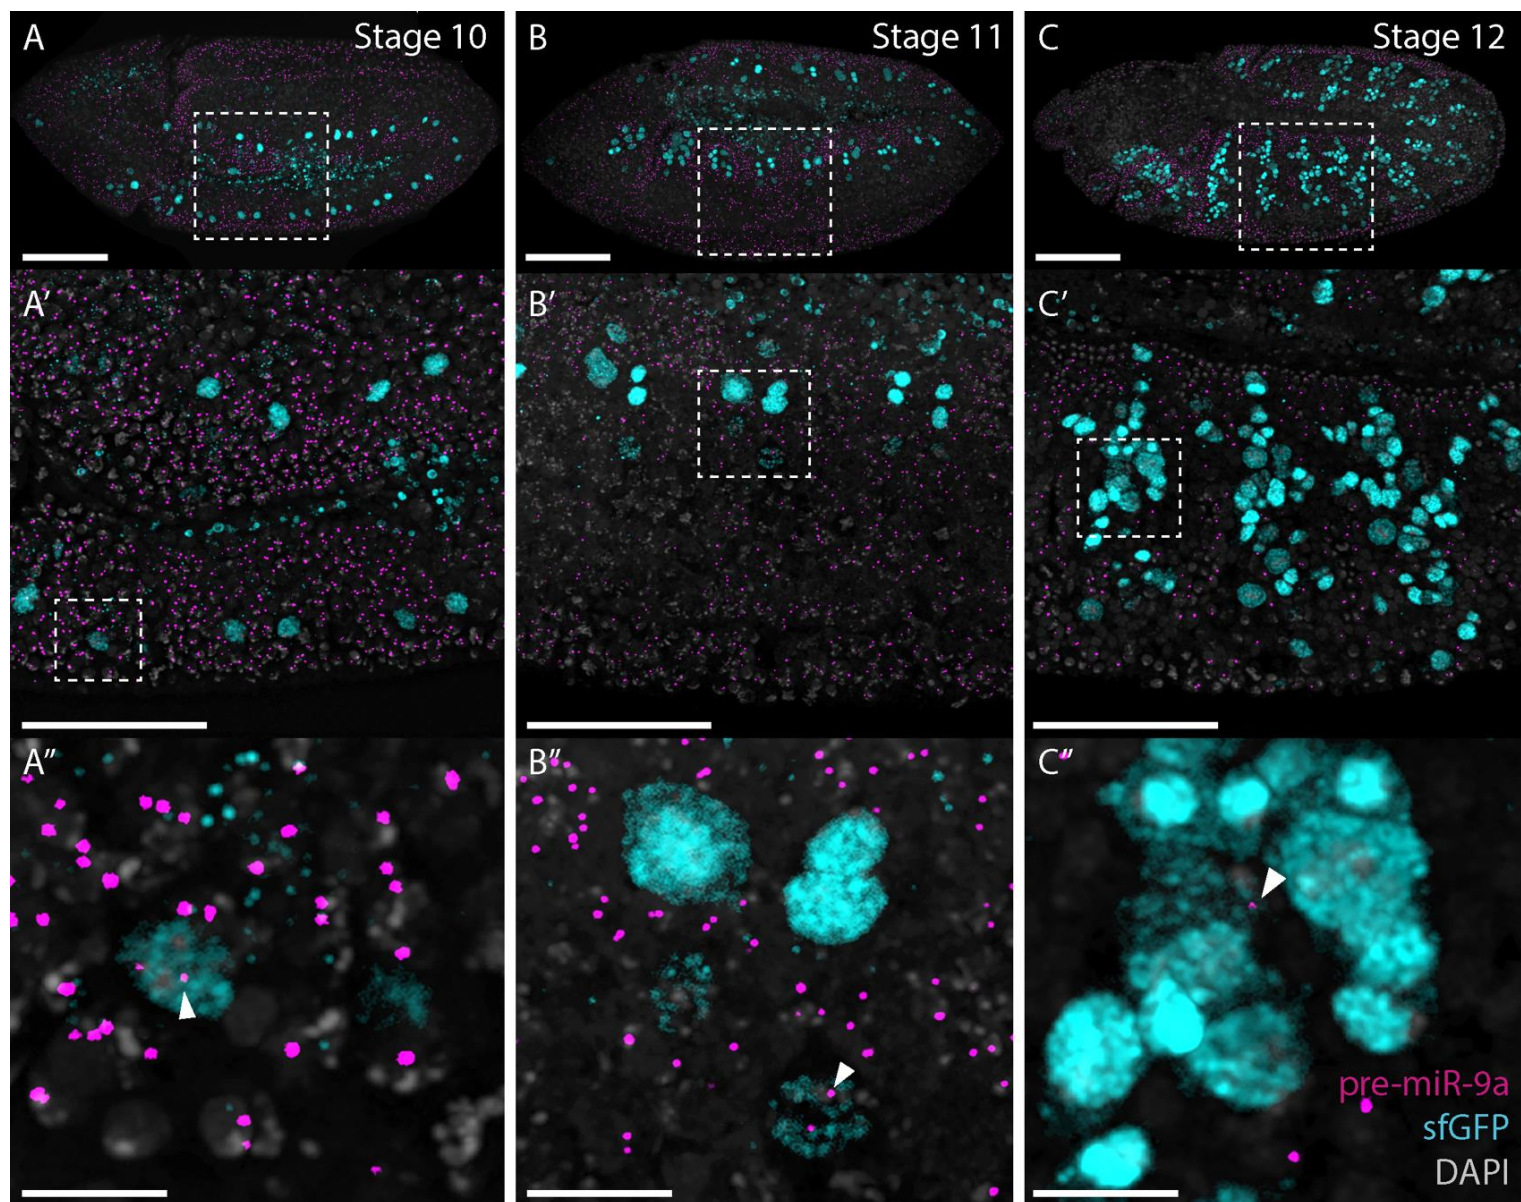

467



468 **Figure 3. *mir-9a* is generally not actively transcribed in *Senseless* expressing cells during**  
469 **embryogenesis.** (A-C) Transgenic embryos stained with probes against pri-*mir-9a* (magenta)  
470 and antibodies against sfGFP (cyan). (A,A',A'') Stage 10 embryo. Sens is expressed in isolated  
471 cells. Some Sens-expressing cells have active sites of transcription for *mir-9a*, but these  
472 appear to be less intense. (B,B',B'') Stage 11 embryo. Sens is expressed in more cells, a few  
473 of which still transcribe *mir-9a*. (C,C',C'') Stage 12 embryo. Sens expression reaches its peak  
474 during embryogenesis and *mir-9a* is generally not transcribed in Sens-expressing cells.  
475 Scalebars: (A-C) 100  $\mu\text{m}$ , (A'-C') 50  $\mu\text{m}$ , (A''-C'') 10  $\mu\text{m}$ .

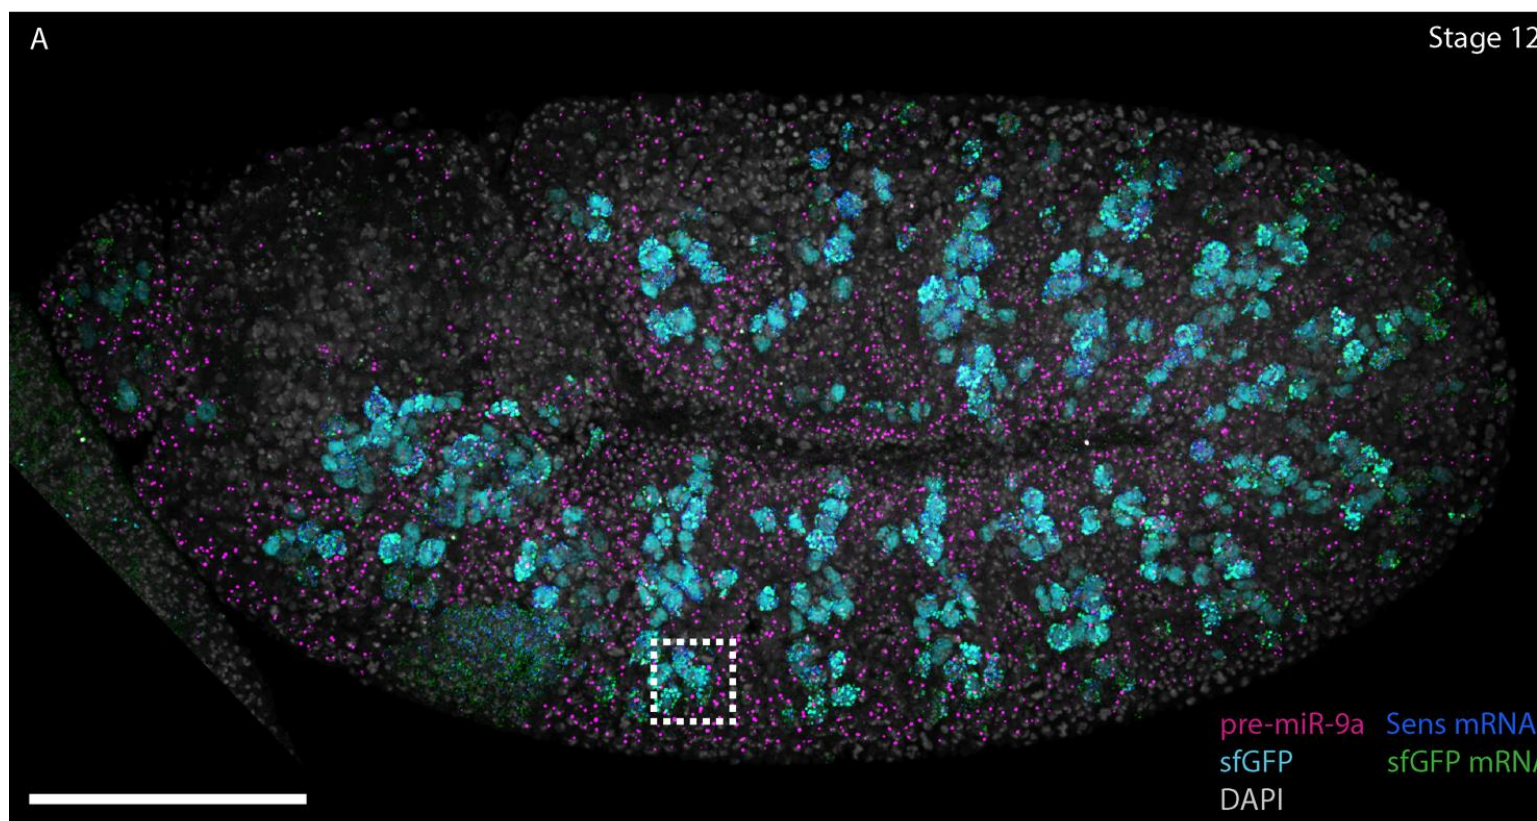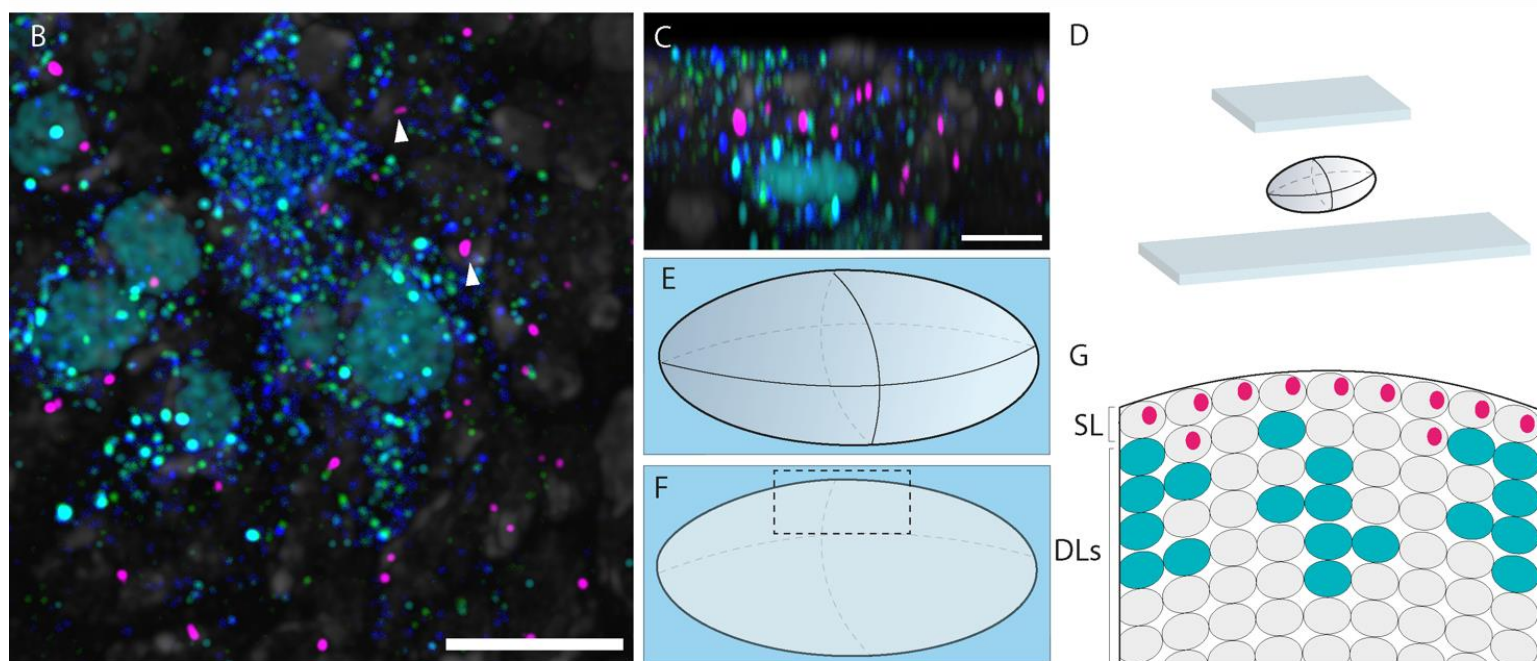

478 **Figure 4. *miR-9a* is actively transcribed after *Senseless* transcription starts but before Sens**  
479 **protein is detectable.** (A) Stage 12 transgenic embryo stained with probes against pri-*mir-*  
480 *9a*, sfGFP mRNA and *Senseless* mRNA and antibody against sfGFP. (B) zoom from different  
481 focal plane showing that some cells transcribing *Senseless* are still transcribing *mir-9a*. (C)  
482 Orthogonal view from (B) showing *mir-9a* is mostly expressed in cells at the embryo surface,  
483 some of which show detectable *Senseless* and GFP mRNA. Cells that already have Sens  
484 protein have migrated inwards. (D) Schematic representation of embryo mounting after  
485 smFISH and/or IF. (E) Lateral view of an embryo. (F) Lateral section of embryo in (E). (G)  
486 Schematic representation of what is reported in panel (C). SL = superficial cellular layer, DLs  
487 = deeper cellular layers. Scalebars: (A) 100  $\mu\text{m}$ , (B, C) 10  $\mu\text{m}$ .

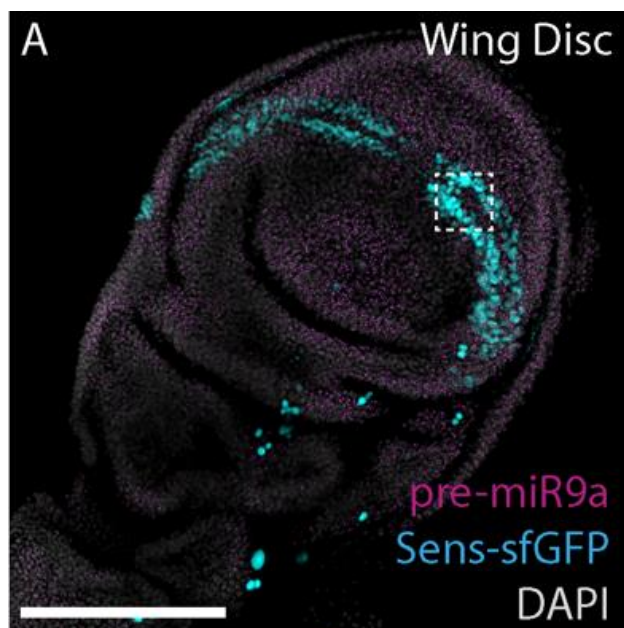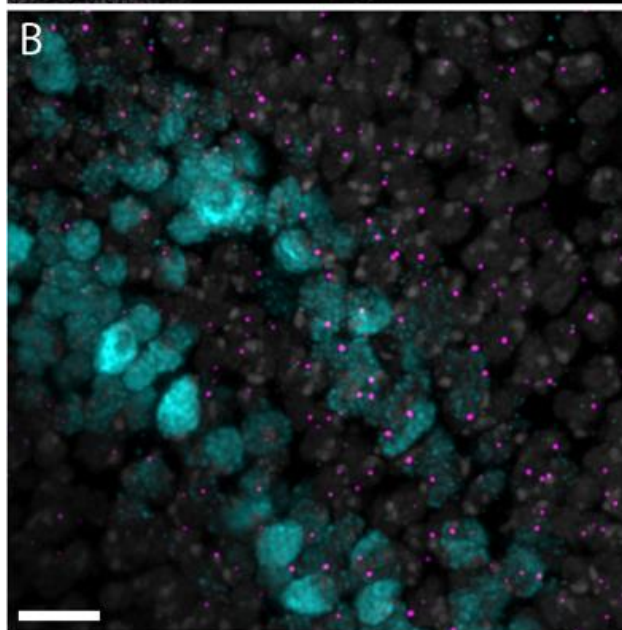

**C** sfGFP relative fluorescence level in mir-9a expressing and non-expressing cells

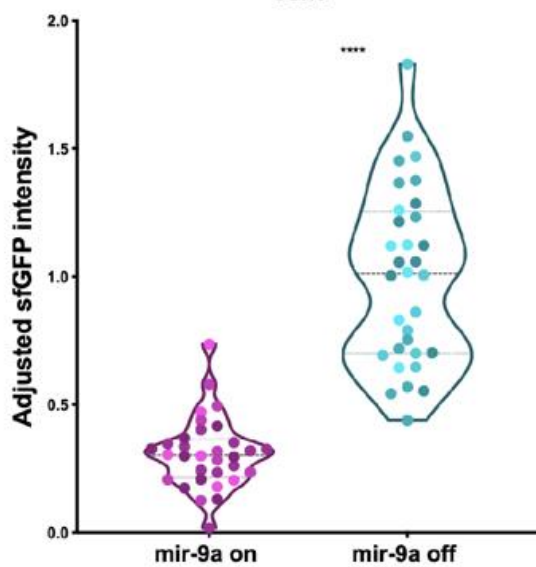

488 **Figure 5. In the wing disc, Sens-expressing cells are generally actively transcribing *mir-9a*.**

489 (A-B) Third instar larval transgenic wing disc stained with probes against pri-*mir-9a* and

490 antibody against sfGFP. Many cells that are actively transcribing *mir-9a* are also expressing

491 Sens. (C) Adjusted sfGFP intensity coming from Sens expressing cells that are and are not

492 actively transcribing *mir-9a*. Different colours represent data coming from different discs

493 (n=4). Data from each replicate was normalized using the maximum adjusted fluorescence

494 value from the group *mir-9a* off from that replicate. Scalebars: (A) 100µm, (B) 10 µm.

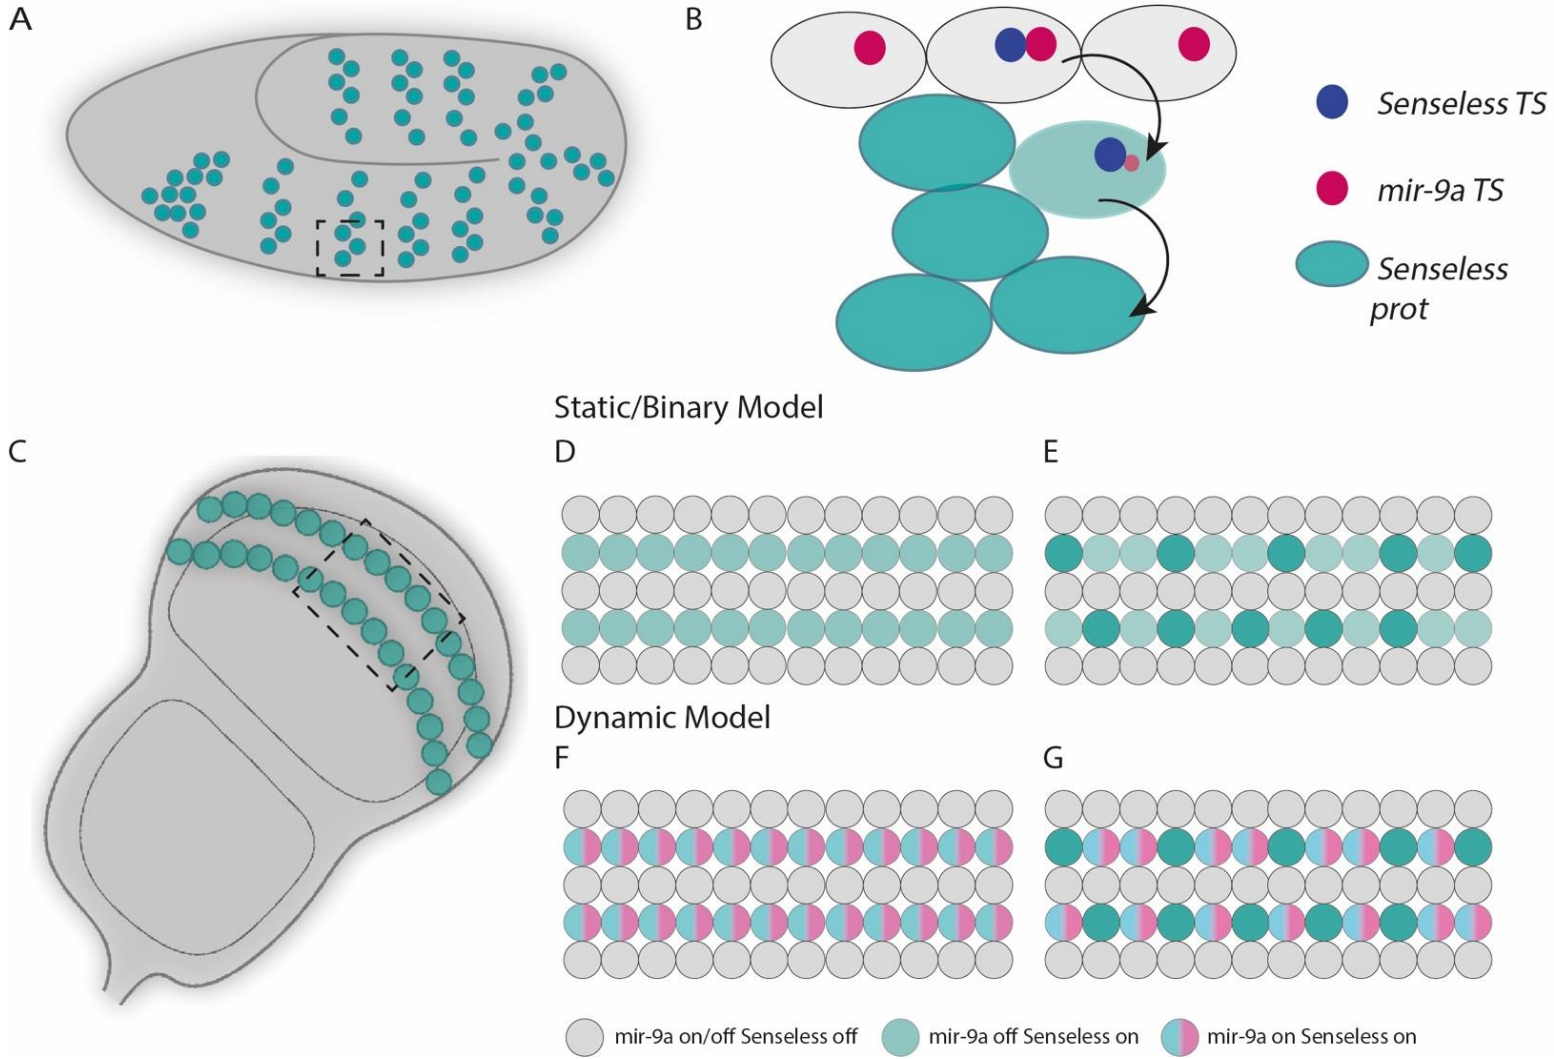

496

497 **Figure 6. Model of *mir-9a* and *Senseless* interaction during embryogenesis and wing disc**  
498 **development.** In the embryo (A) *Senseless* is expressed in clusters of cells. The orthogonal  
499 view of one of these clusters (B) shows that *mir-9a* is transcribed in cells at the top, some of  
500 which are turning *Senseless* transcription on. As *Senseless* mRNA gets translated, these cells  
501 stop transcribing *mir-9a* and move inwards. (C) In the *Drosophila* wing disc, *Senseless* is  
502 expressed in 2 rows of cells (plus additional isolated cells not shown). (D-E) In a static model,  
503 *mir-9a* and *Senseless* are not co-expressed. (F-G) Dynamic model in which all the cells that  
504 contain Sens are transcribing *mir-9a*, which is then turned off in a specific class of SOPs.

505 **Supplemental Table 1**

506 **Table 1. Probes against pri-mir-9a.**

| <b>Probe #</b> | <b>Probe sequence (5'-&gt; 3')</b> |
|----------------|------------------------------------|
| 1              | GTTGGTCAAGTGACTGTAAC               |
| 2              | CCATCGCATTCTCAATGTTT               |
| 3              | CCATTCTTACTCTACTCTTA               |
| 4              | TTATGCCACCAAAACGAGA                |
| 5              | ATATGCACGCTACGACGATC               |
| 6              | AAGCGAGGAGCTGCAATGAT               |
| 7              | GAAAACCTCGATGCCATGGGA              |
| 8              | GTTCGTCCAGAACCAGAAAC               |
| 9              | AGGTCAAAGTTGGACGAGCG               |
| 10             | GCAACGAGATAATGGTCGGA               |
| 11             | GTATGCATTTTGCATAGACT               |
| 12             | GCTGCGAATGCATTGGGAAA               |
| 13             | TACAAGTGTGTTTTTGCGCA               |
| 14             | TTGGTTTTGGCTTTTTGTGT               |
| 15             | TGTCGTCATTGTTGTTTTGG               |
| 16             | GCACACAATCTAATTTCCCA               |
| 17             | CTCGTTTCACCGACTTGTCG               |
| 18             | CCCATGGACATTCACTCGAT               |
| 19             | ATTTATGTTAAGTGCTCGCT               |
| 20             | TTTTTTTTCGCTTTTGGTGC               |



|           |                       |
|-----------|-----------------------|
| <b>21</b> | ATGAACGCTTATTTGCCTC   |
| <b>22</b> | GCCTCCTCTTTTGTTAAATT  |
| <b>23</b> | CTGCAGATGGTTGAAAGGGA  |
| <b>24</b> | GTATATAGAGTCGATTGTGT  |
| <b>25</b> | ACCAAAGACAACATAGCACC  |
| <b>26</b> | TTATCACTCATACAGCTAGA  |
| <b>27</b> | TCGGTAAGCTAGCTTTATGA  |
| <b>28</b> | CTGGGCAGACGCTAATATTA  |
| <b>29</b> | AAGTATACGCAATGTGGGCC  |
| <b>30</b> | GCTTATTTTGATGTGTTTCC  |
| <b>31</b> | ATGCATGGTGTACATATGGG  |
| <b>32</b> | TTGGCCGTAAAGCCAAACTG  |
| <b>33</b> | GGTTTTTTTGCTTGCCAAAG  |
| <b>34</b> | AACTTACTCGTTTGTACGCG  |
| <b>35</b> | CCATGCAAAGGTCGTATCTA  |
| <b>36</b> | GTTTCGAGGGGGTAAAACAA  |
| <b>37</b> | TGTCTTTTCCACCTCTTTTG  |
| <b>38</b> | CAACGTCATTGACTGCTGTT  |
| <b>39</b> | AATCAGTGTTTCATCAGGTGC |
| <b>40</b> | GCCTGCAAATGATCTTTCAT  |
| <b>41</b> | AGCTTGCCGTTATTATCTTG  |
| <b>42</b> | GTTGTTGCTATCCGAAACTT  |
| <b>43</b> | TTTCCTCTAAAGTTCCTAGC  |

|    |                       |
|----|-----------------------|
| 44 | GTTTCGACGGCTTTAAGAGTG |
| 45 | GTTTATGGTGTTTACAAGTT  |
| 46 | ATGTTATTTGCTTACTTTCC  |
| 47 | ATAACTTATTGCACGCTATT  |
| 48 | GCTTCTATTAAGCTGATCA   |

507 **Table 2. Probes against *Senseless***

| Probe # | Probe sequence (5' -> 3') |
|---------|---------------------------|
| 1       | TCACTGGAGACGAACACGTC      |
| 2       | TTCAGTGCGGTTTTATCTTG      |
| 3       | GGATTCGAACGGATCTTCGA      |
| 4       | AATCTCACTTTCTTGCGTT       |
| 5       | TCTCAATACTGTTCACTGCA      |
| 6       | TGGAATCTCACTGGATCTGA      |
| 7       | CGGCGATAGGTGATTCATTT      |
| 8       | TATCACAGTGTTGAAGGCGG      |
| 9       | GATCTCGACCATTGAGTTTC      |
| 10      | GAGCAGCGGGTTGTACAAAA      |
| 11      | AAAATTGGGGCCACAGTAGG      |
| 12      | CTGACCCAAAACCACAGAGG      |
| 13      | TCAAGGCAAAGTCACGATCC      |
| 14      | TTCATTTGGAGTTCATGCTC      |
| 15      | CTTGCTGTTCTCATTGTTAT      |
| 16      | GTGCTTAGATTTAGTGGCAT      |

|           |                        |
|-----------|------------------------|
| <b>17</b> | GTTGGAATCATCCGATGTGA   |
| <b>18</b> | TAACG TTCAGCGAGGTCATC  |
| <b>19</b> | TTTAGATTCACAGCGCTCAG   |
| <b>20</b> | TTGCTGTGGTGTACTCGAAC   |
| <b>21</b> | CGGTGACCAGATGATGTTAC   |
| <b>22</b> | GCTCATACTTGAAC TTTTCGC |
| <b>23</b> | ATTGCAGCGAGGATATGGAT   |
| <b>24</b> | ATGGGCATACA ACTGCTGTT  |
| <b>25</b> | GACGAGGAGGACGAACGACG   |
| <b>26</b> | TTCGTTTTCTCCTTG GTAAG  |
| <b>27</b> | GTTTGCACTGGAAATTCCTG   |
| <b>28</b> | ACGAACGCTTGAAGCTCTTG   |
| <b>29</b> | TGTGGATGAGCAGATGTGTG   |
| <b>30</b> | CCACAATATTGGCAGGGATA   |
| <b>31</b> | ATGTCCGACTTTTGGTGGAA   |
| <b>32</b> | GTATGTATGTACGTGTGCTT   |
| <b>33</b> | TCATATGCGTGATCAGGTTG   |
| <b>34</b> | TGGCAACCGAAGGGTTTATA   |
| <b>35</b> | CTGGAAGGACTGATCGCAA    |
| <b>36</b> | ATCTCCTGGATCAGAGATTG   |
| <b>37</b> | GTCCTGCTTAGCTAATACTG   |
| <b>38</b> | TAGACTTAGGGCCA ACTGTG  |
| <b>39</b> | ACTTTGGCTTCATAGCAACG   |

|    |                      |
|----|----------------------|
| 40 | TCTTTGCGAAGGCCTAAACA |
| 41 | CTTAAGGCAGTATCTTAGCT |
| 42 | GAGTCTTGTGGGATAACT   |
| 43 | TAAGCTAGGGTTTAACGGCT |
| 44 | CTGCCAATTTGGGTTAAGT  |
| 45 | TGAGGTTGTTCTTTGGTACG |
| 46 | TTAGACAAGTGGTCGCCAAG |
| 47 | GTGGGTGATGCCATCAATAA |
| 48 | TTGTTCTCTTTAGCTTTCA  |

508 **Table 3. Probes against sfGFP.**

| Probe # | Probe sequence (5'-> 3') |
|---------|--------------------------|
| 1       | CGGTGAACAGCTCCTCGC       |
| 2       | CACCAGGATGGGCACCAC       |
| 3       | G TTCACGTCGCCATCCAG      |
| 4       | CGCACGCTGAACTTGTGG       |
| 5       | GTCAGCTTGCCGTTGGTG       |
| 6       | CCGGTGGTGCAGATGAAC       |
| 7       | G TAGGTCAGGGTGGTCAC      |
| 8       | G TAGCGGCTGAAGCACTG      |
| 9       | TCGTGCTGCTTCATGTGA       |
| 10      | G CATGGCGCTCTTGAAGA      |
| 11      | TGAAGCTGATGGTGCGCT       |
| 12      | C TTGTAGGTGCCGTCATC      |

|           |                      |
|-----------|----------------------|
| <b>13</b> | TCGAACTTCACCTCGGCG   |
| <b>14</b> | CGGTTACCCAGGGTATCG   |
| <b>15</b> | AAATCGATGCCCTTCAGC   |
| <b>16</b> | CAGGATGTTGCCATCCTC   |
| <b>17</b> | TTGTACTIONCAGCTTGTGG |
| <b>18</b> | GTACACGTTGTGGCTGTT   |
| <b>19</b> | TTCTGCTTATCGGCCGGTG  |
| <b>20</b> | GAAGTTGGCCTTGATGCC   |
| <b>21</b> | TCCACATTGTGGCGGATC   |
| <b>22</b> | TAGTGATCGGCCAGCTGC   |
| <b>23</b> | CGATGGGGGTGTTCTGCT   |
| <b>24</b> | TATCGGGCAGCAGCACTG   |
| <b>25</b> | CTGGGTGCTCAGGTAGTG   |
| <b>26</b> | GTTGGGGTCCTTGGACAG   |
| <b>27</b> | ACCATGTGATCGCGCTTC   |
| <b>28</b> | CGGTCACGAACTCCAGCA   |
| <b>29</b> | TCCATGCCCAGGGTGATG   |
| <b>30</b> | CCTCGAGCTTGTACAGCT   |

509 **References**

- 510 Aboobaker, A. A., P. Tomancak, N. Patel, G. M. Rubin, and E. C. Lai, 2005 *Drosophila*  
511 microRNAs exhibit diverse spatial expression patterns during embryonic development.  
512 Proc. Natl. Acad. Sci. U. S. A. 102: 18017–18022.
- 513 Acar, M., H. Jafar-Nejad, N. Giagtzoglou, S. Yallampalli, G. David *et al.*, 2006 Senseless  
514 physically interacts with proneural proteins and functions as a transcriptional co-  
515 activator. Development 133: 1979–1989.
- 516 Artavanis-Tsakonas, S., and P. Simpson, 1991 Choosing a cell fate: a view from the Notch  
517 locus. Trends Genet. 7: 403–408.
- 518 Barad, O., E. Hornstein, and N. Barkai, 2011 Robust selection of sensory organ precursors by  
519 the Notch-Delta pathway. Curr. Opin. Cell Biol. 23: 663–667.
- 520 Biryukova, I., J. Asmar, H. Abdesselem, and P. Heitzler, 2009 *Drosophila* mir-9a regulates  
521 wing development via fine-tuning expression of the LIM only factor, dLMO. Dev. Biol.  
522 327: 487–496.
- 523 Cassidy, J. J., A. R. Jha, D. M. Posadas, R. Giri, K. J. T. Venken *et al.*, 2013 MiR-9a minimizes  
524 the phenotypic impact of genomic diversity by buffering a transcription factor. Cell 155:  
525 1556–1567.
- 526 Caygill, E. E., and A. H. Brand, 2017 miR-7 Buffers Differentiation in the Developing  
527 *Drosophila* Visual System. Cell Rep. 20: 1255–1261.
- 528 Chatterjee, N., and D. Bohmann, 2012 A versatile  $\phi$ C31 based reporter system for  
529 measuring AP-1 and NRF2 signaling in *Drosophila* and in tissue culture. PLoS One 7:.  
530 Coolen, M., S. Katz, and L. Bally-Cuif, 2013 miR-9: A versatile regulator of neurogenesis.  
531 Front. Cell. Neurosci. 7:.
- 532 Delaloy, C., L. Liu, J. A. Lee, H. Su, F. Shen *et al.*, 2010 MicroRNA-9 Coordinates Proliferation

533 and Migration of Human Embryonic Stem Cell-Derived Neural Progenitors. *Cell Stem*  
534 *Cell* 6: 323–335.

535 Ferretti, E., E. De Smaele, A. Po, L. Di Marcotullio, E. Tosi *et al.*, 2009 MicroRNA profiling in  
536 human medulloblastoma. *Int. J. Cancer* 124: 568–577.

537 Fu, S., C. Y. Nien, H. L. Liang, and C. Rushlow, 2014 Co-activation of microRNAs by Zelda is  
538 essential for early drosophila development. *Dev.* 141: 2108–2118.

539 Ghysen, A., and C. Dambly-Chaudiere, 1989 Genesis of the *Drosophila* peripheral nervous  
540 system. *Trends Genet.* 5: 251–255.

541 Giri, R., D. K. Papadopoulos, D. M. Posadas, H. K. Potluri, P. Tomancak *et al.*, 2020 Ordered  
542 patterning of the sensory system is susceptible to stochastic features of gene  
543 expression. *Elife* 9:.

544 Goulding, S. E., P. zur Lage, and A. P. Jarman, 2000 *amos*, a proneural gene for *Drosophila*  
545 olfactory sense organs that is regulated by *lozenge*. *Neuron* 25: 69–78.

546 Hartenstein, V., 1993 Atlas of *Drosophila* development. *Dev. Drosoph. melanogaster*.

547 Hartenstein, V., 1988 Development of *Drosophila* larval sensory organs: Spatiotemporal  
548 pattern of sensory neurones, peripheral axonal pathways and sensilla differentiation.  
549 *Development* 102: 869–886.

550 Hilgers, V., N. Bushati, and S. M. Cohen, 2010 *Drosophila* microRNAs 263a/b confer  
551 robustness during development by protecting nascent sense organs from apoptosis.  
552 *PLoS Biol.* 8:.

553 Huang, M. L., C. H. Hsu, and C. T. Chien, 2000 The proneural gene *amos* promotes multiple  
554 dendritic neuron formation in the *Drosophila* peripheral nervous system. *Neuron* 25:  
555 57–67.

556 Jafar-Nejad, H., M. Acar, R. Nolo, H. Lacin, H. Pan *et al.*, 2003 *Senseless* acts as a binary

- 557 switch during sensory organ precursor selection. *Genes Dev.* 17: 2966–2978.
- 558 Jafar-Nejad, H., A. C. Tien, M. Acar, and H. J. Bellen, 2006 Senseless and Daughterless confer  
559 neuronal identity to epithelial cells in the *Drosophila* wing margin. *Development* 133:  
560 1683–1692.
- 561 Jan, Y. N., and L. Y. Jan, 1994 Genetic Control of Cell Fate Specification in *Drosophila*  
562 Peripheral Nervous System. *Annu. Rev. Genet.* 28: 373–393.
- 563 Jarman, A. P., Y. Grau, L. Y. Jan, and Y. N. Jan, 1993 atonal is a proneural gene that directs  
564 chordotonal organ formation in the *Drosophila* peripheral nervous system. *Cell* 73:  
565 1307–1321.
- 566 Kim, T. M., W. Huang, R. Park, P. J. Park, and M. D. Johnson, 2011 A developmental  
567 taxonomy of glioblastoma defined and maintained by microRNAs. *Cancer Res.* 71:  
568 3387–3399.
- 569 Lai, E. C., and V. Orgogozo, 2004 A hidden program in *Drosophila* peripheral neurogenesis  
570 revealed: Fundamental principles underlying sensory organ diversity. *Dev. Biol.* 269: 1–  
571 17.
- 572 Leucht, C., C. Stigloher, A. Wizenmann, R. Klafke, A. Folchert *et al.*, 2008 MicroRNA-9 directs  
573 late organizer activity of the midbrain-hindbrain boundary. *Nat. Neurosci.* 11: 641–648.
- 574 Li, Y., F. Wang, J. A. Lee, and F. B. Gao, 2006 MicroRNA-9a ensures the precise specification  
575 of sensory organ precursors in *Drosophila*. *Genes Dev.* 20: 2793–2805.
- 576 Lu, Q., T. F. Rau, V. Harris, M. Johnson, D. J. Poulsen *et al.*, 2011 Increased p38 mitogen-  
577 activated protein kinase signaling is involved in the oxidative stress associated with  
578 oxygen and glucose deprivation in neonatal hippocampal slice cultures. *Eur. J.*  
579 *Neurosci.* 34: 1093–1101.
- 580 Lu, J., and A. Tsourkas, 2009 Imaging individual microRNAs in single mammalian cells in situ.



- 581 Nucleic Acids Res. 37:.
- 582 Mirth, C. K., J. W. Truman, and L. M. Riddiford, 2009 The Ecdysone receptor controls the  
583 post-critical weight switch to nutrition-independent differentiation in *Drosophila* wing  
584 imaginal discs. *Development* 136: 2345–2353.
- 585 Ninova, M., M. Ronshaugen, and S. Griffiths-Jones, 2014 Fast-evolving microRNAs are highly  
586 expressed in the early embryo of *Drosophila virilis*. *Rna* 20: 360–372.
- 587 Nolo, R., L. A. Abbott, and H. J. Bellen, 2000 Senseless, a Zn finger transcription factor, is  
588 necessary and sufficient for sensory organ development in *Drosophila*. *Cell* 102: 349–  
589 362.
- 590 Nowek, K., E. A. C. Wiemer, and M. Jongen-Lavrencic, 2018 The versatile nature of miR-9/9\*  
591 in human cancer. *Oncotarget* 9: 20838–20854.
- 592 Orgogozo, V., and F. Schweisguth, 2004 Evolution of the larval peripheral nervous system in  
593 *Drosophila* species has involved a change in sensory cell lineage. *Dev. Genes Evol.* 214:  
594 442–452.
- 595 Orgogozo, V., F. Schweisguth, and Y. Bellaïche, 2001 Lineage, cell polarity and inscuteable  
596 function in the peripheral nervous system of the *Drosophila* embryo. *Development*  
597 128: 631–643.
- 598 Packer, A. N., Y. Xing, S. Q. Harper, L. Jones, and B. L. Davidson, 2008 The bifunctional  
599 microRNA miR-9/miR-9\* regulates REST and CoREST and is downregulated in  
600 Huntington's disease. *J. Neurosci.* 28: 14341–14346.
- 601 Raad, H., J. F. Ferveur, N. Ledger, M. Capovilla, and A. Robichon, 2016 Functional Gustatory  
602 Role of Chemoreceptors in *Drosophila* Wings. *Cell Rep.* 15: 1442–1454.
- 603 Reeves, N., and J. W. Posakony, 2005 Genetic programs activated by proneural proteins in  
604 the developing *Drosophila* PNS. *Dev. Cell* 8: 413–425.

- 605 Sarov, M., C. Barz, H. Jambor, M. Y. Hein, C. Schmied *et al.*, 2016 A genome-wide resource  
606 for the analysis of protein localisation in *Drosophila*. *Elife* 5:.
- 607 Sempere, L. F., S. Freemantle, I. Pitha-Rowe, E. Moss, E. Dmitrovsky *et al.*, 2004 Expression  
608 profiling of mammalian microRNAs uncovers a subset of brain-expressed microRNAs  
609 with possible roles in murine and human neuronal differentiation. *Genome Biol.* 5:.
- 610 Singhania, A., and W. B. Grueber, 2014 Development of the embryonic and larval peripheral  
611 nervous system of *Drosophila*. *Wiley Interdiscip. Rev. Dev. Biol.* 3: 193–210.
- 612 Timmons, L., J. Becker, P. Barthmaier, C. Fyrberg, A. Shearn *et al.*, 1997 Green fluorescent  
613 protein/ $\beta$ -galactosidase double reporters for visualizing *Drosophila* gene expression  
614 patterns. *Dev. Genet.* 20: 338–347.
- 615 Trcek, T., T. Lionnet, H. Shroff, and R. Lehmann, 2017 mRNA quantification using single-  
616 molecule FISH in *Drosophila* embryos. *Nat. Protoc.* 12: 1326–1347.
- 617 Tsanov, N., A. Samacoits, R. Chouaib, A. M. Traboulsi, T. Gostan *et al.*, 2016 SmiFISH and  
618 FISH-quant - A flexible single RNA detection approach with super-resolution capability.  
619 *Nucleic Acids Res.* 44:.
- 620 Wheeler, B. M., A. M. Heimberg, V. N. Moy, E. A. Sperling, T. W. Holstein *et al.*, 2009 The  
621 deep evolution of metazoan microRNAs. *Evol. Dev.* 11: 50–68.
- 622 Yoo, A. S., A. X. Sun, L. Li, A. Shcheglovitov, T. Portmann *et al.*, 2011 MicroRNA-mediated  
623 conversion of human fibroblasts to neurons. *Nature* 476: 228–231.
- 624 Zhao, C., G. Sun, S. Li, and Y. Shi, 2009 A feedback regulatory loop involving microRNA-9 and  
625 nuclear receptor TLX in neural stem cell fate determination. *Nat. Struct. Mol. Biol.* 16:  
626 365–371.
- 627

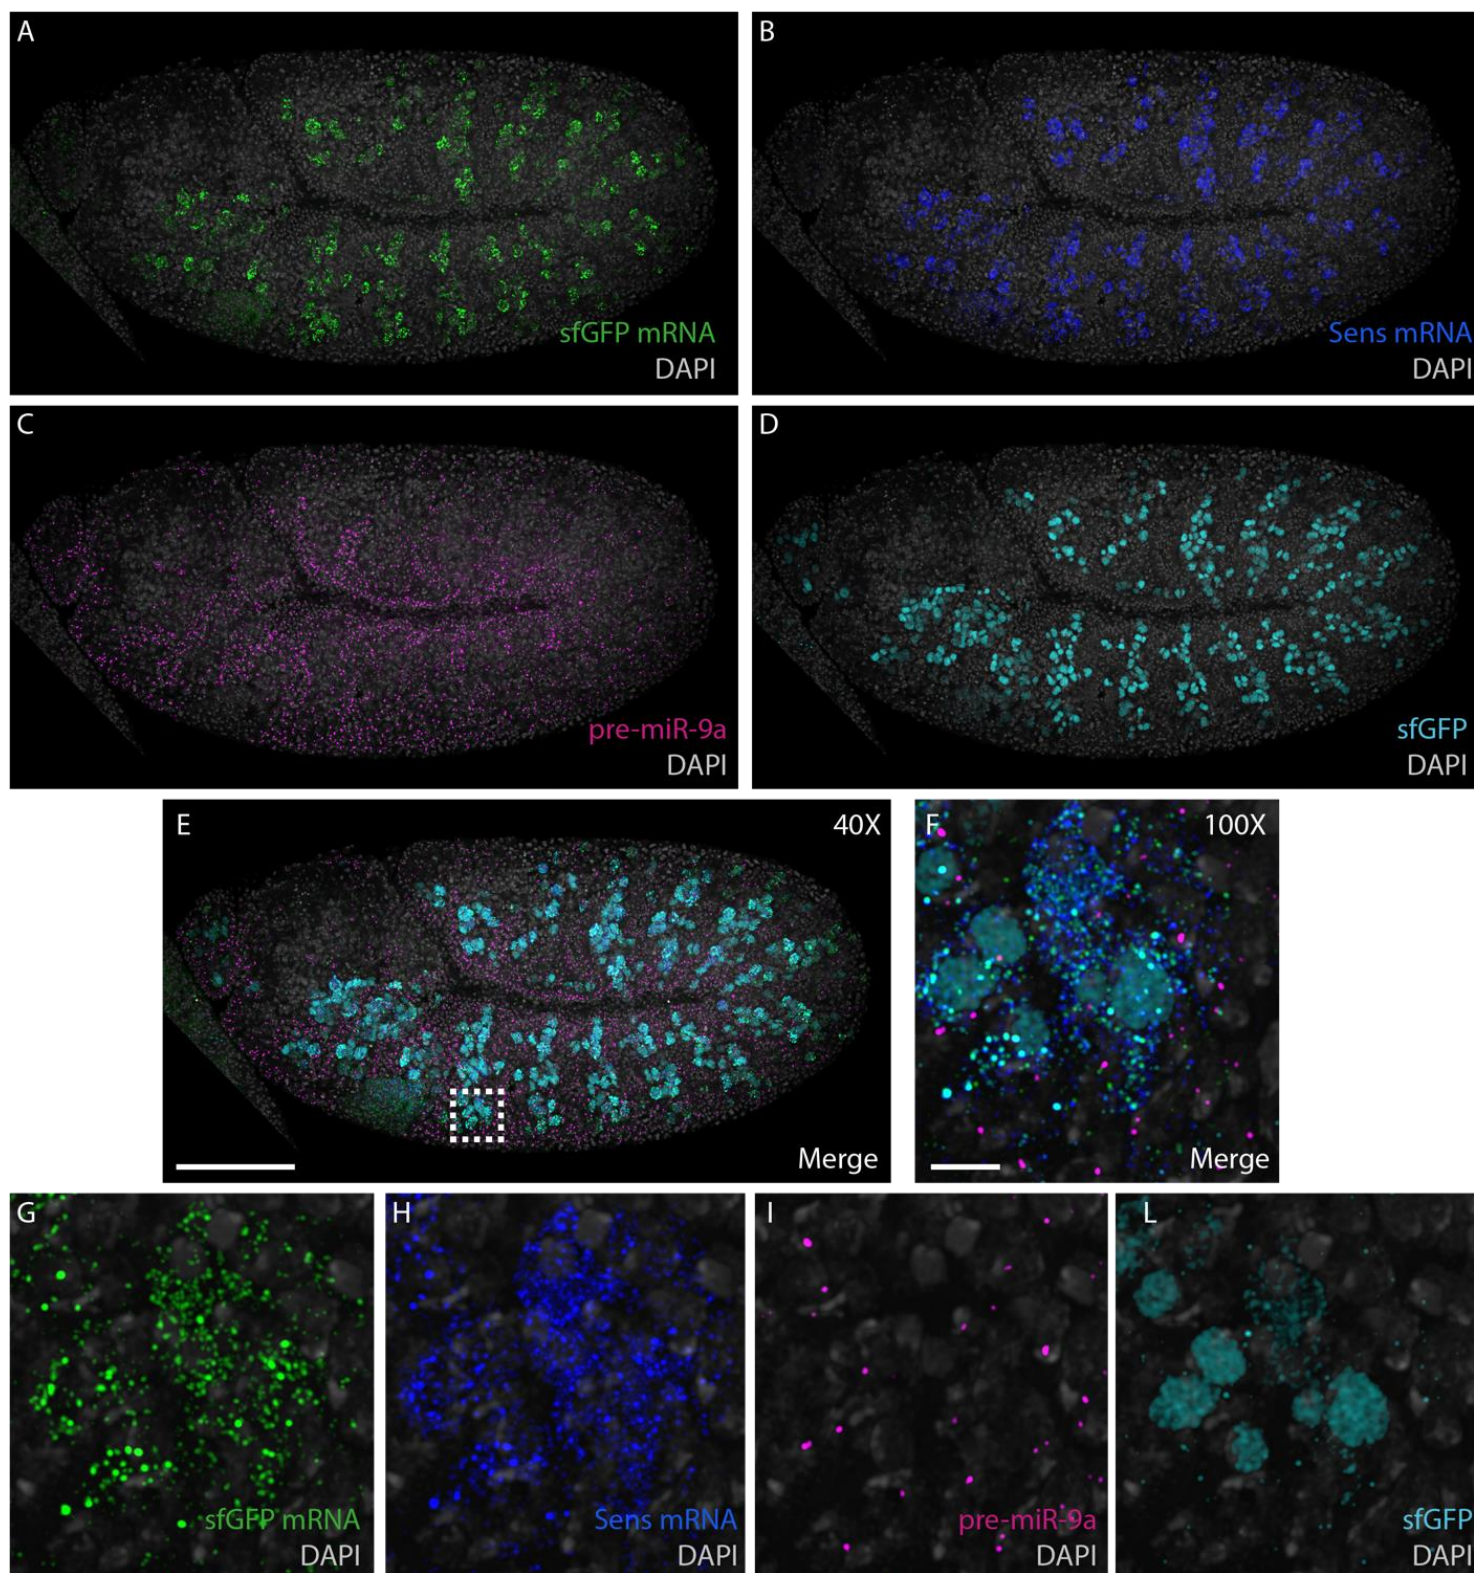

629

630 **Supplementary Figure S1** Single Channels from Fig.4

631 (A) sfGFP probes 40X. (B) *Senseless* probes 40X. (C) pre-*miR-9a* probes 40X. (D) sfGFP  
632 antibody 40X. (E) Merge 40X. (F) Merge 100X. (G) sfGFP probes 100X. (H) *Senseless*  
633 probes 100X. (I) pre-*miR-9a* probes 100X. (L) sfGFP antibody 100X.
